# Supplementary material for: The Potential Role of Selected miRNA in Uveal Melanoma Primary Tumors as Early Biomarkers of Disease Progression
Source: Genes (Basel). 2020 Mar 2;11(3):271. doi: 10.3390/genes11030271 (PMC7140886; doi:10.3390/genes11030271)
Supplement: Supplementary file 1 [file genes-11-00271-s001.pdf]

## BAP1+ *vs* BAP1-

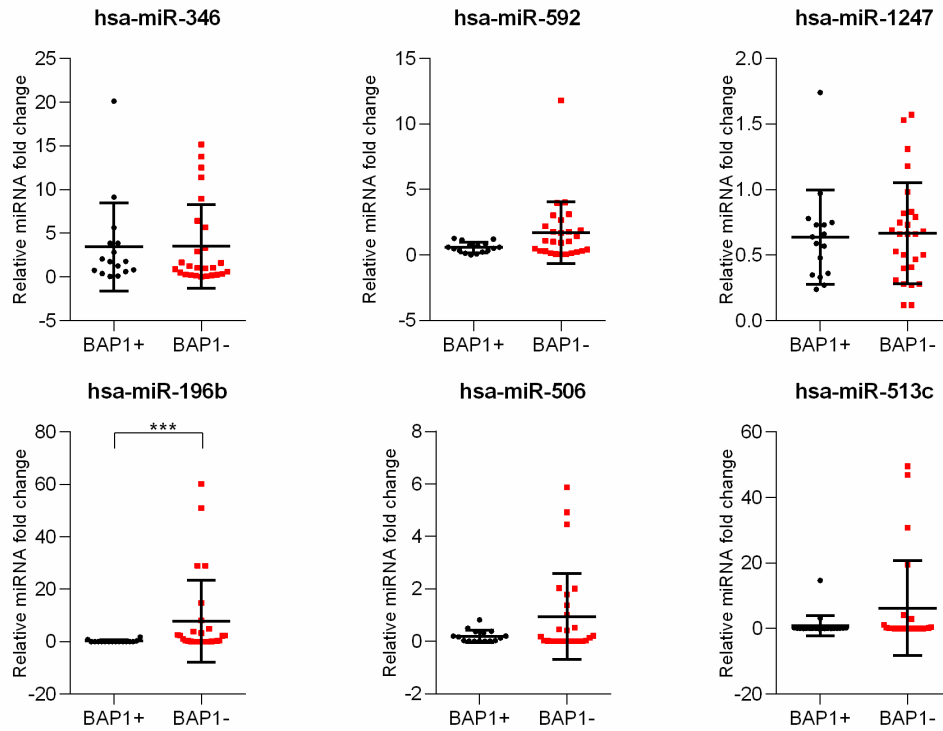

## Disomy 3 *vs* Monosomy 3

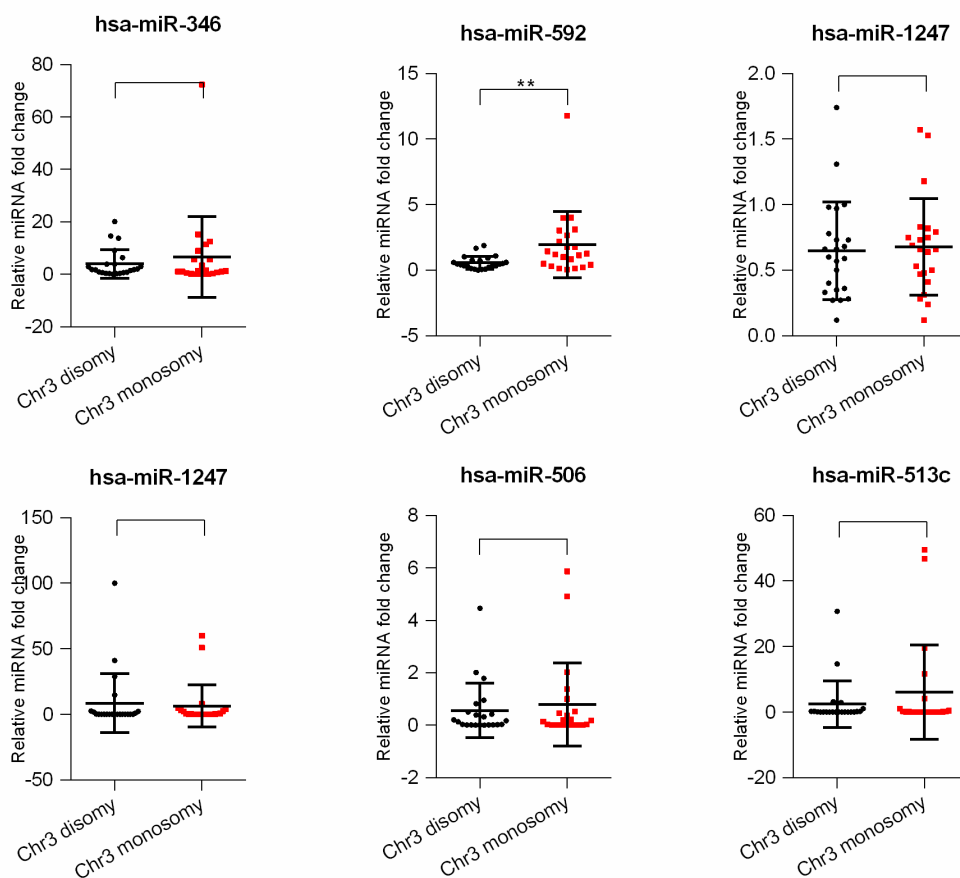

Figure S1. miRNA differentially expressed between BAP1+/- and chromosome 3 disomy/ monosomy uveal melanoma tumors . The results are displayed as relative miRNA fold change calculated as log<sub>2</sub>-ΔΔCt. Each dot represents an individual patient. The graph represents mean ±SD. The statistical differences between two groups were analyzed with Mann-Whitney test where: \* p < 0.05, \*\* p < 0.01, \*\*\* p < 0.001, \*\*\*\* p < 0.0001.
